# Supplementary material for: Lactobacillus paracasei HY7015 and Lycopus lucidus Turcz. Extract Promotes Human Dermal Papilla Cell Cytoprotective Effect and Hair Regrowth Rate in C57BL/6 Mice
Source: MDPI journal article supplement (doi:10.3390/molecules27238235), 2022-11-25
Supplement: s1 [file s1]

## Supplementary S1

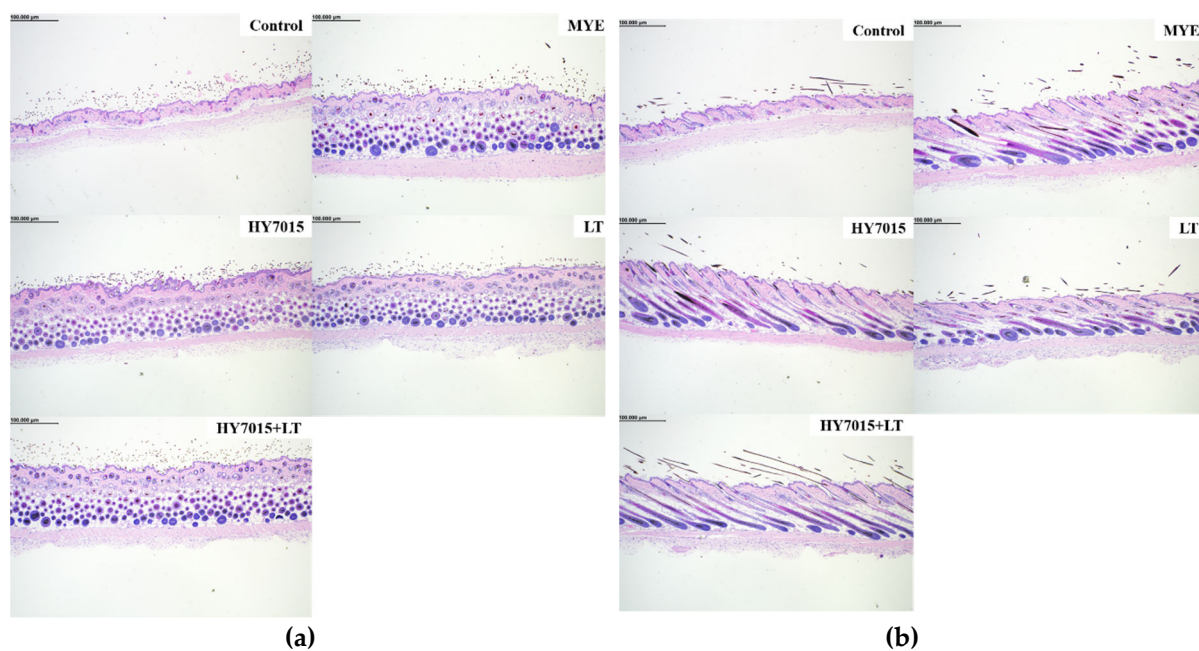

**Figure S1.** (a) Longitudinal and (b) transverse sections of mouse dorsal skin tissue samples by H&E staining.

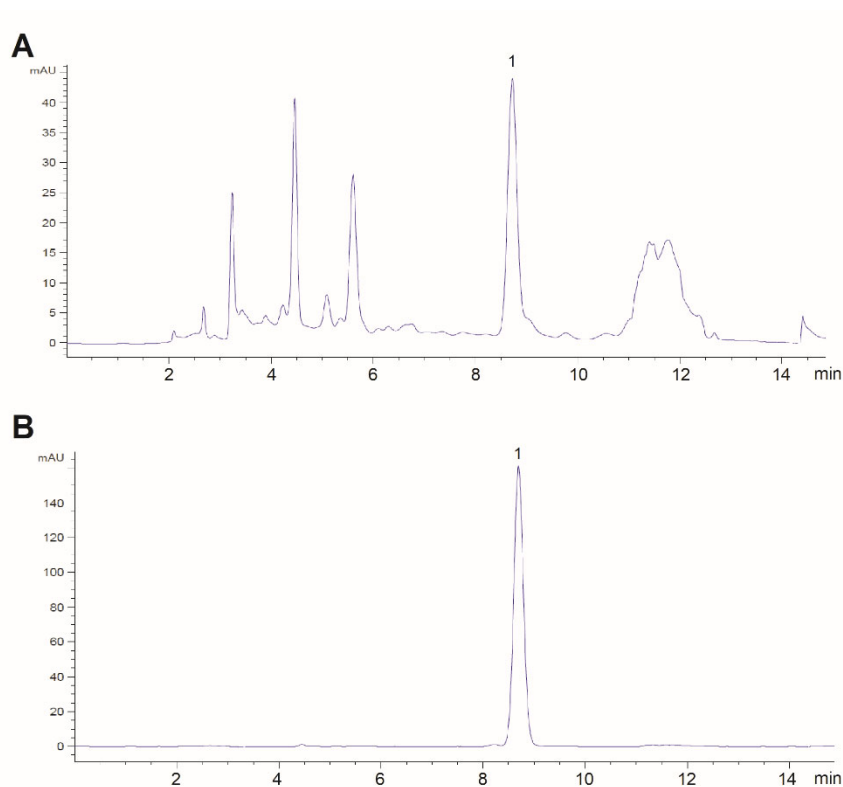

**Figure S2.** Liquid chromatogram of *Lycopus lucidus* Turcz. extract (A) and 50 µg/mL of rosmarinic acid standard (B). DAD detection at  $\lambda = 330$  nm, 1 - rosmarinic acid.
